# Supplementary material for: Simultaneous improvement of the dielectric constant and leakage currents of ZrO2 dielectrics by incorporating a highly valent Ta5+ element
Source: Royal Society of Chemistry journal article supplement (doi:10.1039/c8tc03640c), 2018-01-01
Supplement: c8tc03640c1.pdf [file c8tc03640c1.pdf]

Supporting information

## Simultaneous Improvement of Dielectric Constant and Leakage Currents of ZrO<sub>2</sub> Dielectrics by Incorporating Highly Valent Ta<sup>5+</sup> Element

Bo-Eun Park,<sup>a,†</sup> Il-Kwon Oh,<sup>a,†</sup> Jong Seo Park,<sup>a</sup> Seunggi Seo,<sup>a</sup> David Thompson,<sup>b</sup> and Hyungjun Kim<sup>a\*</sup>

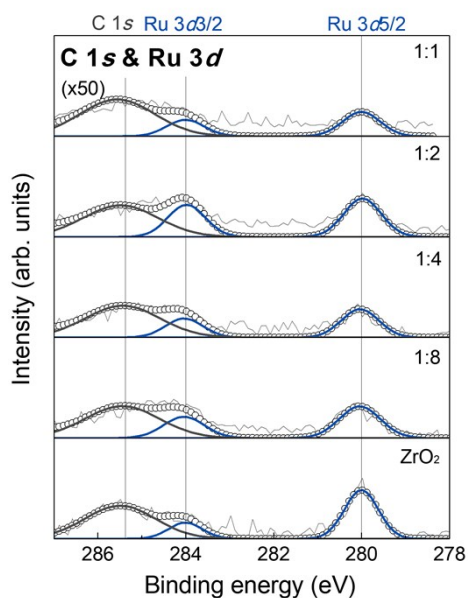

Figure S1. Ru 3d spectra of 10-nm ALD undoped and Ta-doped ZrO<sub>2</sub> on Ru
